# Supplementary material
Source: PubMed Central journal article supplement (PMC3594635)

## Supplemental Information

### Methods

#### Mouse strains

The Gpr177F<sub>x</sub>, K5-Cre, Dermo1-Cre, R26R,  $\beta$ -cat $\Delta$ Ex3F<sub>x</sub> and Axin2<sup>lacZ</sup> mouse strains, and genotyping methods were reported previously (Fu et al., 2011; Harada et al., 1999; Soriano, 1999; Sosic et al., 2003; Tarutani et al., 1997; Yu et al., 2005a; Yu et al., 2003). For generating Gpr177<sup>K5</sup> mouse strain, mice carrying the K5-Cre transgene was first crossed with the Gpr177F<sub>x</sub>/F<sub>x</sub> mice to obtain the K5-Cre; Gpr177F<sub>x</sub>/+ strain. The K5-Cre; Gpr177F<sub>x</sub>/+ mice were then crossed with the Gpr177F<sub>x</sub>/F<sub>x</sub> mice to obtain mice carrying the Gpr177<sup>K5</sup> (genotype: K5-Cre; Gpr177F<sub>x</sub>/F<sub>x</sub>). A similar breeding strategy was used to generate the Gpr177<sup>Dermo1</sup> (genotype: Dermo1-Cre; Gpr177F<sub>x</sub>/F<sub>x</sub>) mutant strain. To examine the Cre activity, K5-Cre and Dermo1-Cre mice were bred into the R26R heterozygous background to obtain the K5-Cre; R26R and Dermo1-Cre; R26R mice, respectively. To simultaneously delete Gpr177 and monitor the Cre-mediated recombination, Gpr177<sup>Dermo1</sup> mice were crossed into the R26R background to obtain the Gpr177<sup>Dermo1</sup>; R26R mutants. The deletion of Gpr177 and expression of lacZ reporter occurred when Cre was expressed. For detecting the Axin2 expression, K5-Cre; Gpr177F<sub>x</sub>/+ mice was crossed with mice homozygous for Gpr177F<sub>x</sub> and Axin2<sup>lacZ</sup> to create the Gpr177<sup>K5</sup>; Axin2<sup>lacZ</sup> (genotype: K5-Cre; Gpr177F<sub>x</sub>/F<sub>x</sub>; Axin2<sup>lacZ</sup>+/+) mice. To express the stabilized  $\beta$ -catenin mutant protein in the Gpr177<sup>K5</sup> mice, the K5-Cre; Gpr177F<sub>x</sub>/+ mice were crossed with mice carrying Gpr177F<sub>x</sub>/F<sub>x</sub> and  $\beta$ -cat $\Delta$ Ex3F<sub>x</sub>/+ to generate the Gpr177<sup>K5</sup>; s $\beta$ cat<sup>K5</sup> strain. Care and use of experimental animals described in this work comply with guidelines and policies of the University Committee on Animal Resources at the University of Rochester.

#### Cells

To isolate epidermal and dermal cells, the dorsolateral skins were dissected from the E14.5 embryos. The skin tissues were then incubated in 0.5% Dispase (STEMCELL Technologies Inc., Vancouver, BC, Canada) at 4°C for 2 hours. The epidermal and dermal layers were separated from each other, followed by dissociating into single cells. Primary epidermal and dermal cells were cultured in the CnT-PCT (CellnTEC, Switzerland) and DMEM media, respectively, with 10% FBS in a humidified chamber with 5% CO<sub>2</sub> at 37°C. For detection of Wnt secretion, 293T cells were transfected with TOPFLASH and RL-TK plasmids and co-cultured with the dermal cells for 24 hours. Relative luciferase activity was determined using a dual reporter luciferase kit (Promega, Madison, WI, USA).

#### **Histology, $\beta$ -gal staining, immunostaining, immunoblot and TUNEL analysis**

Samples were fixed in formaldehyde or paraformaldehyde and then embedded to obtain paraffin sections which were stained with hematoxylin and eosin for histology or antibodies for immunological staining with avidin:biotinylated enzyme complex as described (Chiu et al., 2008; Fu et al., 2011; Fu et al., 2009; Maruyama et al., 2010; Yu et al., 2005a; Yu et al., 2010; Yu et al., 2005b). The immunological staining was visualized by enzymatic color reaction or fluorescence according to the manufacture's specification (Vector Laboratories, Burlingame, CA, USA). Images were taken using Zeiss Axio Observer microscope (Carl Zeiss, Thornwood, NY, USA). Immunoblot analysis was performed as described (Fu et al., 2009). Bound primary antibodies were detected with horseradish peroxidase-conjugated secondary antibodies, followed by enhanced chemical luminescence-mediated visualization (GE Healthcare Biosciences, Pittsburgh, USA) and autoradiography. Mouse monoclonal antibodies ABC (Millipore, Billerica, MA, USA), AE3 (Millipore),  $\beta$ -catenin (BD Biosciences, San Jose, CA, USA) BrdU (Thermo Scientific, Fremont, CA, USA), Collagen I (Abcam, Cambridge, MA, USA), Keratin 14

(Thermo Scientific) and SMA (Thermo Scientific); rabbit polyclonal antibodies Adiponectin (ProSci, Poway, CA, USA), CD133 (Novus, Littleton, CO, USA), Dvl2 (Cell Signaling Technology, Danvers, MA), Keratin 17 (Abcam), phosphor-GSK3 (Cell Signaling Technology) and Gpr177 (Fu et al., 2011; Fu et al., 2009; Yu et al., 2010); rabbit monoclonal antibody active caspase-3 (BD Biosciences) were used in these analyses. Details for  $\beta$ -gal staining in whole mounts or sections were described previously (Fu et al., 2009; Maruyama et al., 2010; Yu et al., 2005b). TUNEL staining was performed using ApopTag (Millipore) as described (Maruyama et al., 2010; Yu et al., 2007).

### RT-PCR analysis

Total RNA isolated from E14.5 mouse skins was subject to the first strand cDNA synthesis using oligoT primers in 20  $\mu$ l for 1 hour at 50°C. The cDNA was then amplified by PCR (35 cycles, 94°C for 15 seconds, 58°C for 30 seconds and 72°C for 60 seconds) in 50  $\mu$ l buffered solution containing 1  $\mu$ l of the diluted reverse transcription product in the presence of 20 pmoles each of the sense and antisense primers specific for the various target sequences as listed.

|                |                          |
|----------------|--------------------------|
| Wnt 1 Forward  | ATGAACCTTCACAACAACGAG    |
| Wnt 1 Reverse  | GGTTGCTGCCTCGGTTG        |
| Wnt 2 Forward  | CTGGCTCTGGCTCCCTCTG      |
| Wnt 2 Reverse  | GGAAGTGGTGTGGCACTCTG     |
| Wnt 2b Forward | CGTTCGTCTATGCTATCTCGTCAG |
| Wnt 2b Reverse | ACACCGTAATGGATGTTGTCCTAC |
| Wnt 3 Forward  | CAAGCACAACAATGAAGCAGGC   |
| Wnt 3 Reverse  | TCGGGACTCACGGTGTTCCTC    |
| Wnt 3a Forward | CACCACCGTCAGCAACAGCC     |
| Wnt 3a Reverse | AGGAGCGTGTCCTGCGAAAG     |
| Wnt 4 Forward  | GAGAAGTGTGGCTGTGACCGG    |
| Wnt 4 Reverse  | ATGTTGTCCGAGCATCCTGACC   |
| Wnt 5a Forward | CTCCTTCGCCAGGTTGTTATAG   |
| Wnt 5a Reverse | TGTCTTCGCACCTTCTCCAATG   |
| Wnt 5b Forward | ATGCCCGAGAGCGTGAGAAG     |

|                 |                           |
|-----------------|---------------------------|
| Wnt 5b Reverse  | ACATTTGCAGGCGACATCAGC     |
| Wnt 6 Forward   | TGCCCGAGGCGCAAGACTG       |
| Wnt 6 Reverse   | ATTGCAAACACGAAAGCTGTCTCTC |
| Wnt 7a Forward  | CGACTGTGGCTGCGACAAG       |
| Wnt 7a Reverse  | CTTCATGTTCTCCTCCAGGATCTTC |
| Wnt 7b Forward  | TCTCTGCTTTGGCGTCCCTCTAC   |
| Wnt 7b Reverse  | GCCAGGCCAGGAATCTTGTTG     |
| Wnt 8a Forward  | ACGGTGGAAATTGTCCTGAGCATG  |
| Wnt 8a Reverse  | GATGGCAGCAGAGCGGATGG      |
| Wnt 8b Forward  | TTGGGACCGTTGGAATTGCC      |
| Wnt 8b Reverse  | AGTCATCACAGCCACAGTTGTC    |
| Wnt 9a Forward  | GCAGCAAGTTTGTCAAGGAGTTCC  |
| Wnt 9a Reverse  | GCAGGAGCCAGACACACCATG     |
| Wnt 9b Forward  | AAGTACAGCACCAAGTTCCTCAGC  |
| Wnt 9b Reverse  | GAACAGCACAGGAGCCTGACAC    |
| Wnt 10a Forward | CCTGTTCTTCCTACTGCTGCTGG   |
| Wnt 10a Reverse | CGATCTGGATGCCCTGGATAGC    |
| Wnt 10b Forward | TTCTCTCGGGATTTCTTGGATTC   |
| Wnt 10b Reverse | TGCACTTCCGCTTCAGGTTTTTC   |
| Wnt 11 Forward  | CTGAATCAGACGCAACACTGTAAAC |
| Wnt 11 Reverse  | CTCTCTCCAGGTCAAGCAGGTAG   |
| Wnt 16 Forward  | AGTAGCGGCACCAAGGAGAC      |
| Wnt 16 Reverse  | GAAACTTTCTGCTGAACCACATGC  |
| Shh Forward     | GGAACTCACCCCAATTACA       |
| Shh Reverse     | GAAGGTGAGGAAGTCGCTGT      |
| Edar Forward    | GCCCTACATGTCCTGTGGAT      |
| Edar Reverse    | GGCCTGAGAGCTCTTTGTGA      |
| BMP2 Forward    | AGGCGAAGAAAAGCAACAGA      |
| BMP2 Reverse    | GTCTCTGCTTCAGGCCAAAC      |
| BMP4 Forward    | TGAGAGACCCCAAGCCTAAGA     |
| BMP4 Reverse    | AAACTTGCTGGAAAGGCTCA      |
| Lef1 Forward    | CACACATCCCGTCAGATGTC      |
| Lef1 Reverse    | TGAGGCTTCACGTGCATTAG      |
| Dkk4 Forward    | GTGGAAGACACAAGGCCAGT      |
| Dkk4 Reverse    | TGGAGCAGACTTGTCCCTCT      |

### **In situ hybridization**

In situ hybridization analysis was performed as described (Chiu et al., 2008; Fu et al., 2009; Yu et al., 2010). In brief, embryos were incubated with digoxigenin labeled probes, followed by recognition with an alkaline phosphatase conjugated anti-digoxigenin antibody. To visualize the bound signals, samples were incubated with BM-purple for 4-5 hours. The RNA

probes were generated using a PCR based method described previously (David and Wedlich, 2001). Briefly, T3 or T7 promoter sequences were introduced to the 5-prime end of the reverse and forward primers, enabling the synthesis of antisense and sense transcripts, respectively. PCR fragments were then amplified using gene-specific primers and purified with Quick-spin columns (Qiagen Inc., Valencia, CA, USA), followed by generation of the digoxigenin labeled probes using T3 or T7 RNA polymerase. Quantification of the positively stained domains was performed by measuring areas with J-image software (n=3 individual experiments, mean  $\pm$  SD).

Fig. S1. Gpr177 is expressed in hair follicle development. Double labeling of Gpr177 with AE3, a marker for the entire epidermis, or K14, a marker for the epidermal basal layer, identifies the Gpr177-expressing cells at E14.5 and E17.5. Sections are counterstained by DAPI. Panels show the individually stained and superimposed images. Scale bars, 50  $\mu$ m.

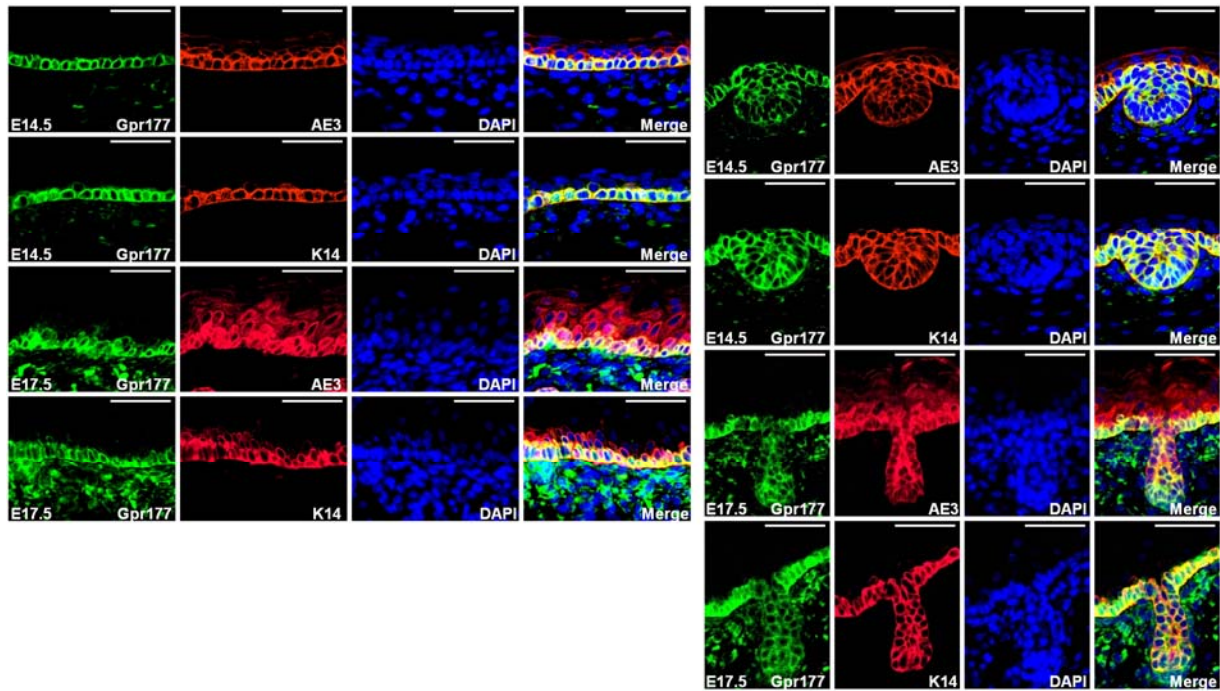

Fig. S2. Wnt production and signaling is impaired in the *Gpr177<sup>K5</sup>* mutants. (a) Primary epidermal cells isolated from the E14.5 control and *Gpr177<sup>K5</sup>* skins as the signal-producing cells were co-cultured with the signal-receiving cells harboring the TOPFLASH reporter. Relative luciferase activity (RLA) determined activation of the  $\beta$ -catenin and Lef/Tcf-dependent transcription. The addition of canonical Wnt3a and noncanonical Wnt5a in the media was used as the positive and negative controls, respectively. Asterisk indicates the statistical significance of reduction ( $p$  value  $<0.01$ ,  $n=3$ ). (b) Immunoblot analysis of Dvl2, phosphorylated Dvl2 (pDvl2), phosphorylated GSK3, activated  $\beta$ -catenin (ABC),  $\beta$ -catenin ( $\beta$ -cat) determined the canonical Wnt signaling activity in the E14.5 epidermis of control and *Gpr177<sup>K5</sup>*. The level of pDvl2, pGSK3 and ABC is elevated upon stimulation of Wnt signaling (Logan and Nusse, *Annu Rev Cell Dev Biol*, 2004). The epidermal deletion of *Gpr177* reduces activation of Dvl2, GSK3 and  $\beta$ -catenin in the epidermis. Actin level is used as a loading control.

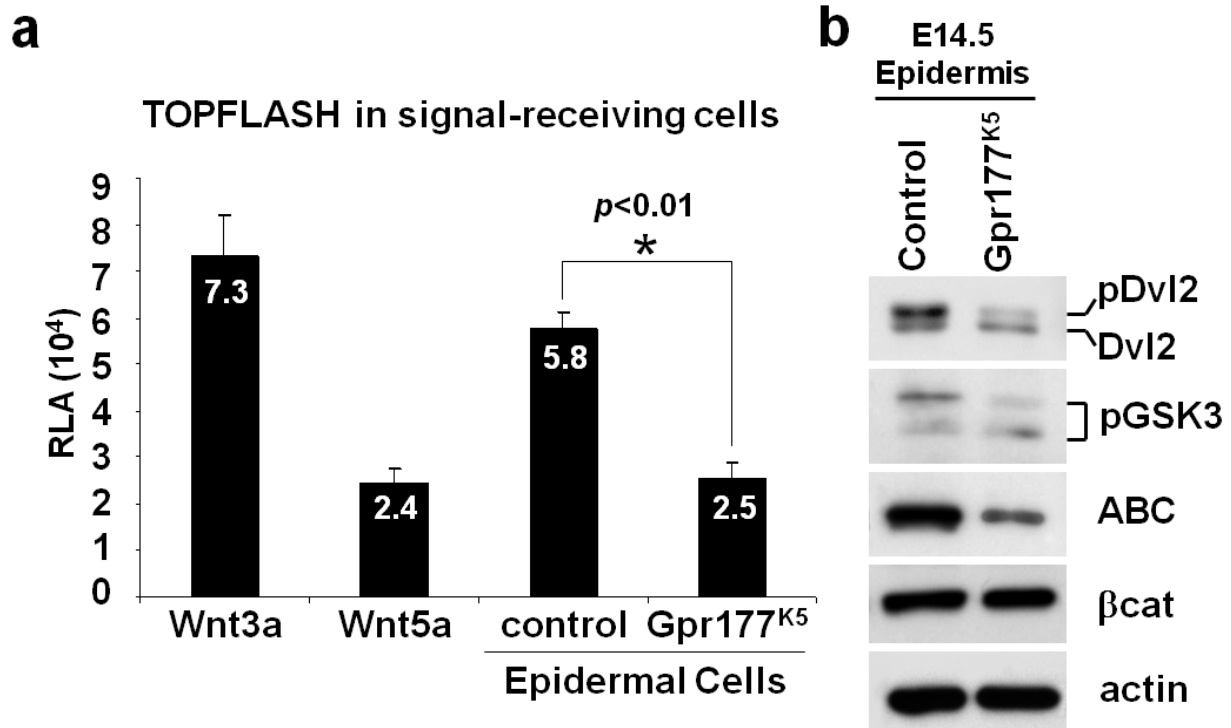

Fig. S3. Multiple members of the Wnt family are expressed in developing embryonic skin. RT-PCR analysis detects the transcript of *Wnts* 2, 3, 4, 5a, 6, 7a, 7b, 10a, 10b, 11 and 16, but not *Wnts* 1, 2b, 3a, 5b, 8a, 8b, 9a and 9b in the E14.5 skins.

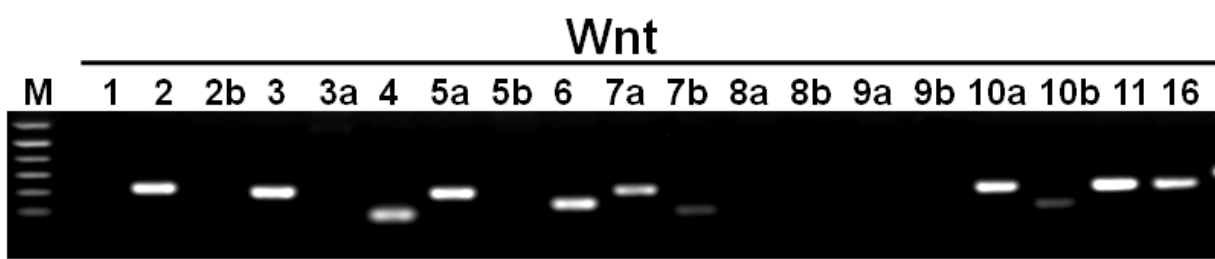



Fig. S4. Epidermal cell proliferation is affected by Gpr177 deficiency. Using BrdU incorporation assay, cells undergoing mitotic division are identified by immunostaining of BrdU in the E14.5 control (a) and Gpr177<sup>K5</sup> (b) skins. Graph shows the percentage of proliferating cells positive for BrdU in the epidermis and dermis (c). Asterisk indicates that the reduction in the epidermis caused by the epidermal deletion of Gpr177 is statistically significant (Gpr177<sup>K5</sup>: 23.91±0.01% and control: 34.03±0.03%; *p* value <0.01, n=3). TUNEL staining (d-f) and immunostaining of activated caspase3 (g-i) detect apoptotic cells in the skins (d, e, g, h) and dorsal root ganglia (DRG; f, i) of control (d, f, g, i) and Gpr177<sup>K5</sup> (e, h) at E14.5. Broken lines indicate the epidermal-dermal junction and the DRG. Genotype – Control: Gpr177F<sub>x</sub>/F<sub>x</sub> or K5-Cre; Gpr177F<sub>x</sub>/+ and Gpr177<sup>K5</sup>: K5-Cre; Gpr177F<sub>x</sub>/F<sub>x</sub>. Scale bars, 50 μm (a, b, d-i).

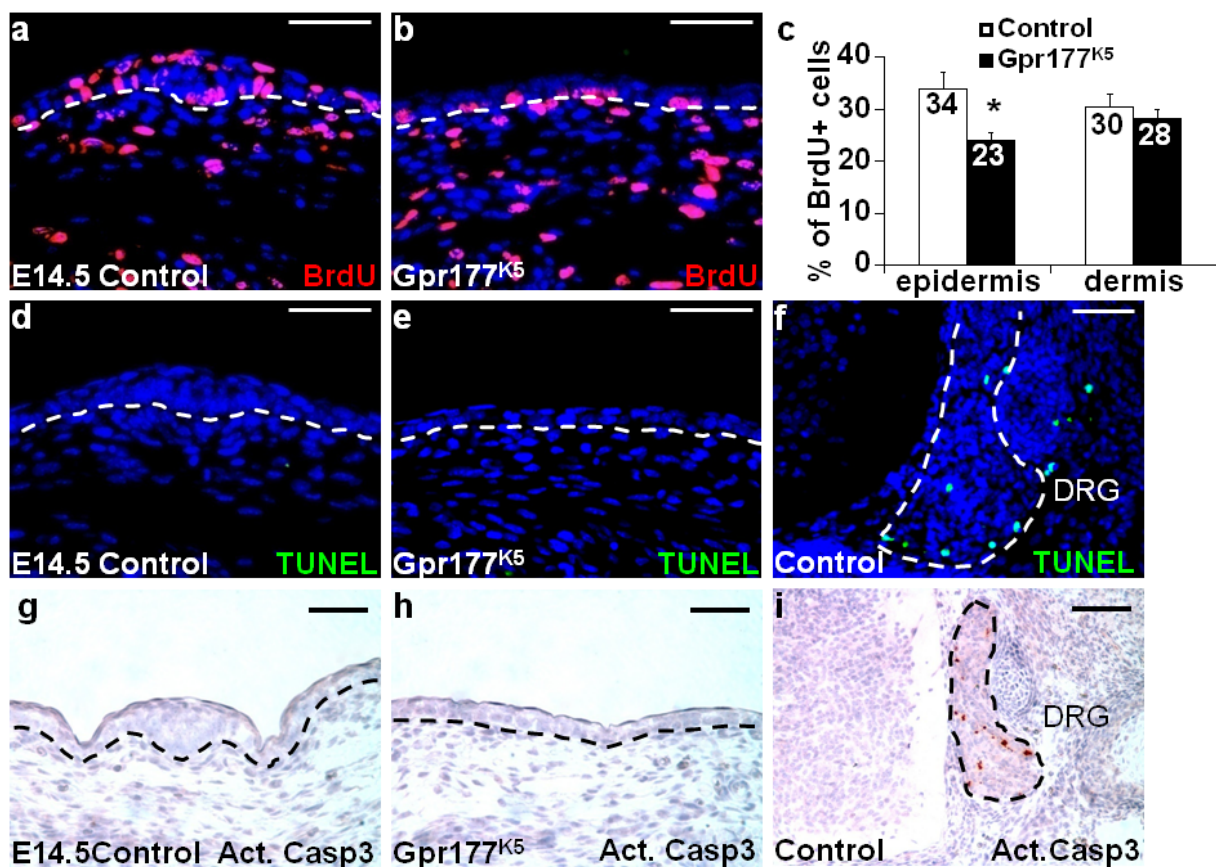

Fig. S5. Deletion of Gpr177 in the dermis causes dermal abnormalities. Using BrdU incorporation assay, cells undergoing mitotic division are identified by immunostaining of BrdU in the E14.5 control (a) and Gpr177<sup>Dermo1</sup> (b) skins. Graph shows the percentage of proliferating cells positive for BrdU in the epidermis and dermis (c). Asterisk indicates that the reduction in the dermis caused by the dermal deletion of Gpr177 is statistically significant (Gpr177<sup>Dermo1</sup>: 19.01±0.03% and control: 32.21±0.03%; *p* value <0.01, n=3). TUNEL staining (d-f) and immunostaining of activated caspase3 (g-i) detect apoptotic cells in the skins (d, e, g, h) and DRG (f, i) of control (d, f, g, i) and Gpr177<sup>Dermo1</sup> (e, h) skins at E14.5. Sections of the E15.5 control (j, l, n) and Gpr177<sup>Dermo1</sup> (k, m, o) skins are analyzed by immunostaining of Collagen I (Col 1; j, k), smooth muscle actin (SMA; l, m) and adiponectin (AdipoNT; n, o). Graph shows the percentage of cells positive for the differentiation markers in the dermis (p). Asterisks indicates that the alterations of differentiation caused by the dermal deletion of Gpr177 are statistically significant (\*, *p* value <0.01; \*\*, *p* value <0.05; n=3). Broken lines indicate the epidermal-dermal junction and the DRG. Genotype – Control: Gpr177<sup>Fx/Fx</sup> or Dermo1-Cre; Gpr177<sup>Fx/+</sup> and Gpr177<sup>Dermo1</sup>: Dermo1-Cre; Gpr177<sup>Fx/Fx</sup>. Scale bars, 50 μm (a, b, d-o).

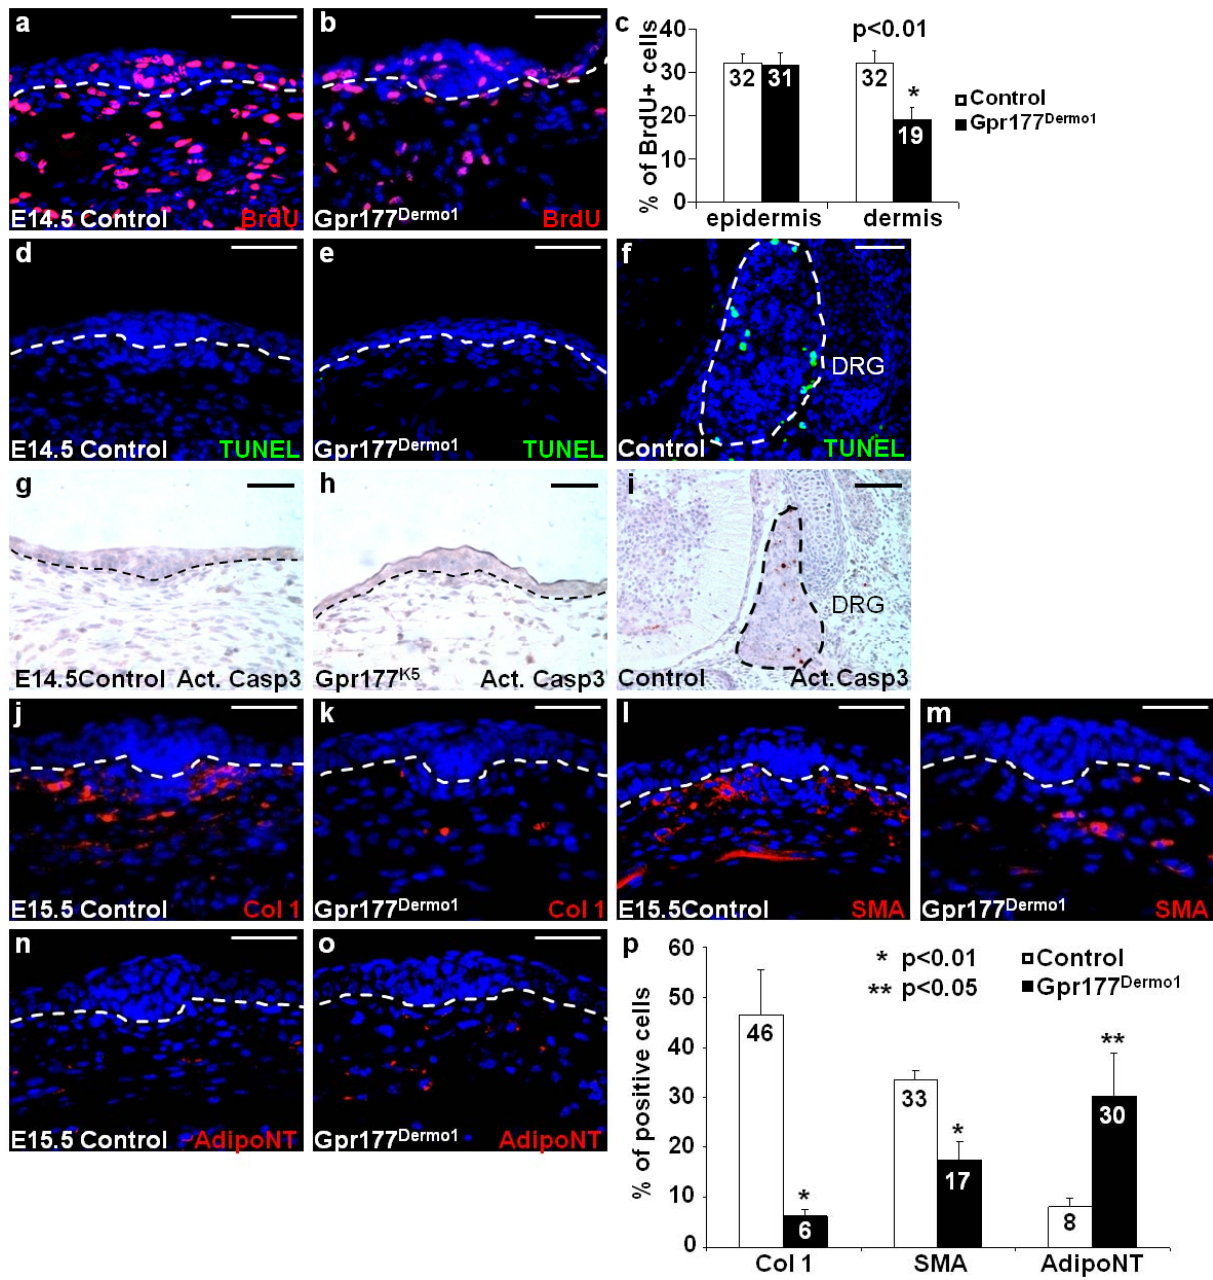

Fig. S6. Wnt secretion is impaired in the  $Gpr177^{Dermo1}$  mutants. (a) Primary dermal cells isolated from the E14.5 control and  $Gpr177^{Dermo1}$  skins as the signal-producing cells were co-cultured with the signal-receiving cells harboring the TOPFLASH reporter. Relative luciferase activity (RLA) determined activation of the  $\beta$ -catenin and Lef/Tcf-dependent transcription. The addition of canonical Wnt3a and noncanonical Wnt5a in the media was used as the positive and negative controls, respectively. Asterisk indicates the statistical significance of reduction ( $p$  value  $<0.013$ ,  $n=3$ ). (b) Immunoblot analysis of Dvl2, phosphorylated Dvl2 (pDvl2), phosphorylated GSK3, activated  $\beta$ -catenin (ABC),  $\beta$ -catenin ( $\beta$ -cat) determined the canonical Wnt signaling activity in the E14.5 epidermis and dermis, and the primary dermal cells of control and  $Gpr177^{Dermo1}$  in vivo and ex vivo, respectively. The level of pDvl2, pGSK3 and ABC is elevated upon stimulation of Wnt signaling. The dermal deletion of  $Gpr177$  causes either a slight reduction or no obvious effects on activation of Dvl2, GSK3 and  $\beta$ -catenin most likely due to the presence of epidermal Wnt in vivo. However, activation of canonical Wnt signaling was significantly reduced in the  $Gpr177^{Dermo1}$  dermal cells free of epidermal cells in the ex vivo culture. Actin level is used as a loading control.

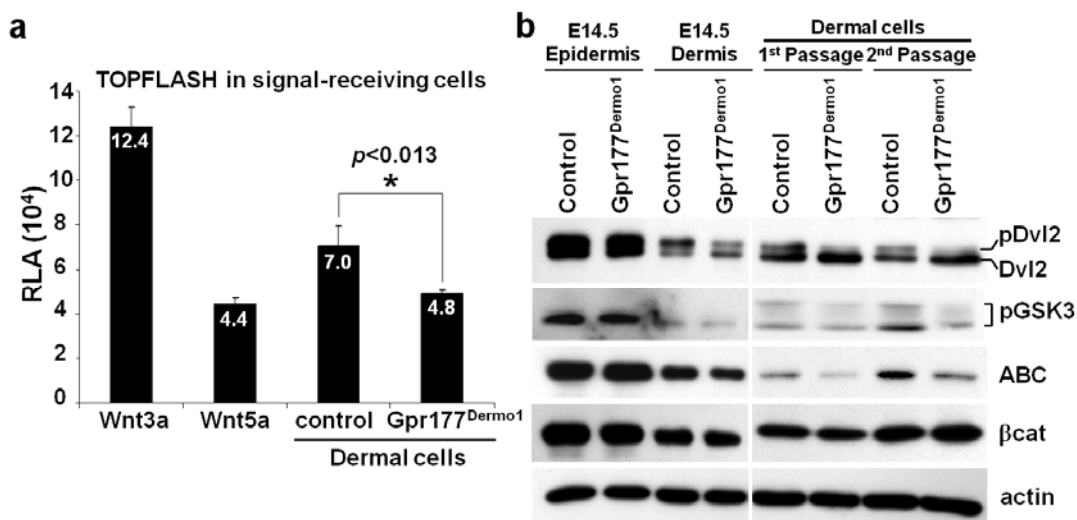

Supplement: NIHMS411206-supplement-01.pdf [file NIHMS411206-supplement-01.pdf]
